# Supplementary material
Source: publisher figshare collection journal article supplement (https://tandf.figshare.com/ndownloader/files/13992977)
Supplement: Supplementary file 1 [file 13992977]

**Supplementary Table 1:** Abundance of predators collected during the study period in Kibaha from 2008 - 2010

| **Sampling date** | Predator species | | | | | | | |
| --- | --- | --- | --- | --- | --- | --- | --- | --- |
| *C. nigrita* | *C. runipustulatus* | *E. nigromaculatus* | *H. bigeminata* | *H. amurensis* | *C. montrouzieri* | *S. lemolea* | *C.* *perspicax* |
| 03_Nov_08 | 5 | 4 | 3 | 6 | 0 | 3 | 0 | 3 |
| 10_Nov_08 | 3 | 6 | 2 | 4 | 2 | 5 | 1 | 11 |
| 17_Nov_08 | 7 | 5 | 4 | 6 | 3 | 2 | 3 | 6 |
| 25_Nov_08 | 9 | 8 | 1 | 8 | 1 | 1 | 5 | 10 |
| 03_Dec_08 | 4 | 4 | 0 | 5 | 0 | 2 | 3 | 14 |
| 10_Dec_08 | 7 | 6 | 5 | 11 | 1 | 4 | 2 | 18 |
| 18_Dec_08 | 16 | 9 | 0 | 13 | 0 | 3 | 5 | 23 |
| 26_Dec_08 | 23 | 15 | 2 | 8 | 0 | 0 | 16 | 15 |
| 02_Jan_09 | 67 | 26 | 0 | 34 | 3 | 5 | 3 | 48 |
| 10_Jan_09 | 43 | 12 | 0 | 17 | 0 | 0 | 12 | 17 |
| 18_Jan_09 | 25 | 9 | 6 | 8 | 0 | 0 | 8 | 33 |
| 26_Jan_09 | 38 | 22 | 0 | 2 | 0 | 2 | 2 | 9 |
| 03_Feb_09 | 46 | 5 | 0 | 9 | 6 | 0 | 1 | 3 |
| 11_Feb_09 | 12 | 8 | 0 | 2 | 0 | 0 | 6 | 5 |
| 19_Feb_09 | 5 | 2 | 19 | 6 | 0 | 0 | 0 | 1 |
| 27_Feb_09 | 17 | 6 | 4 | 0 | 0 | 0 | 0 | 7 |
| 07_Mar_09 | 8 | 0 | 1 | 5 | 0 | 1 | 3 | 2 |
| 15_Mar_09 | 6 | 0 | 0 | 0 | 0 | 0 | 0 | 4 |
| 23_Mar_09 | 2 | 0 | 1 | 0 | 0 | 0 | 0 | 2 |
| 31_Mar_09 | 4 | 1 | 0 | 0 | 0 | 0 | 0 | 6 |
| 08_Apr_09 | 3 | 2 | 3 | 5 | 2 | 3 | 1 | 3 |
| 16_Apr_09 | 2 | 0 | 1 | 4 | 0 | 0 | 0 | 6 |
| 24_Apr_09 | 4 | 6 | 8 | 4 | 3 | 6 | 4 | 3 |
| 02_May_09 | 2 | 3 | 6 | 6 | 7 | 3 | 5 | 6 |
| 10_May_09 | 3 | 5 | 9 | 5 | 6 | 5 | 2 | 4 |
| 18_May_09 | 0 | 5 | 0 | 2 | 0 | 0 | 6 | 2 |
| 26_May_09 | 3 | 4 | 3 | 3 | 4 | 3 | 5 | 7 |
| 03_Jun_09 | 2 | 6 | 6 | 5 | 6 | 5 | 3 | 6 |
| 11_Jun_09 | 4 | 3 | 5 | 4 | 2 | 4 | 2 | 4 |
| 19_Jun_09 | 5 | 3 | 4 | 2 | 3 | 2 | 4 | 6 |
| 27_Jun_09 | 4 | 4 | 2 | 5 | 7 | 5 | 6 | 9 |
| 05_July_09 | 3 | 4 | 4 | 3 | 4 | 3 | 6 | 8 |
| 13_July_09 | 4 | 2 | 5 | 11 | 1 | 0 | 3 | 0 |
| 21_July_09 | 7 | 4 | 8 | 14 | 2 | 2 | 5 | 3 |
| 29_July_09 | 5 | 3 | 12 | 15 | 1 | 0 | 4 | 9 |
| 06_Aug_09 | 3 | 1 | 10 | 14 | 3 | 1 | 1 | 6 |
| 14_Aug_09 | 5 | 0 | 3 | 11 | 0 | 0 | 1 | 0 |
| 22_Aug_09 | 3 | 4 | 5 | 8 | 4 | 3 | 6 | 9 |
| 30_Aug_09 | 6 | 2 | 3 | 10 | 2 | 6 | 4 | 6 |
| 07_Sept_09 | 4 | 4 | 4 | 11 | 3 | 3 | 13 | 11 |
| 15_Sept_09 | 3 | 0 | 0 | 9 | 0 | 0 | 6 | 4 |
| 23_Sept_09 | 6 | 3 | 4 | 7 | 4 | 3 | 8 | 3 |
| 01_Oct_09 | 4 | 5 | 2 | 10 | 1 | 5 | 7 | 11 |
| 09_Oct_09 | 3 | 3 | 1 | 13 | 3 | 2 | 6 | 9 |
| 17_Oct_09 | 2 | 1 | 0 | 7 | 0 | 0 | 2 | 0 |
| 25_Oct_09 | 8 | 3 | 4 | 4 | 2 | 4 | 3 | 7 |
| 01_Nov_09 | 12 | 5 | 2 | 5 | 5 | 6 | 8 | 11 |
| 09_Nov_09 | 10 | 3 | 1 | 2 | 7 | 2 | 5 | 8 |
| 17_Nov_09 | 14 | 1 | 0 | 1 | 0 | 0 | 0 | 4 |
| 25_Nov_09 | 18 | 4 | 3 | 4 | 3 | 4 | 9 | 10 |
| 03_Dec_09 | 15 | 3 | 4 | 7 | 2 | 3 | 6 | 8 |
| 11_Dec_09 | 17 | 7 | 0 | 3 | 0 | 0 | 5 | 9 |
| 19_Dec_09 | 19 | 13 | 2 | 5 | 0 | 0 | 8 | 12 |
| 27_Dec_09 | 20 | 27 | 6 | 2 | 0 | 1 | 3 | 6 |
| 04_Jan_10 | 26 | 9 | 0 | 13 | 2 | 0 | 23 | 24 |
| 12_Jan_10 | 38 | 2 | 0 | 6 | 0 | 3 | 7 | 11 |
| 20_Jan_10 | 10 | 13 | 2 | 14 | 1 | 5 | 1 | 8 |
| 28_Jan_10 | 8 | 4 | 0 | 9 | 0 | 0 | 9 | 25 |
| 05_Feb_10 | 13 | 1 | 0 | 0 | 3 | 0 | 0 | 6 |
| 13_Feb_10 | 3 | 8 | 1 | 0 | 0 | 0 | 0 | 0 |
| 21_Feb_10 | 2 | 10 | 0 | 0 | 0 | 0 | 0 | 0 |
| 01_Mar_10 | 0 | 5 | 0 | 2 | 0 | 0 | 2 | 4 |
| 09_Mar_10 | 4 | 0 | 0 | 0 | 0 | 0 | 0 | 0 |
| 17_Mar_10 | 5 | 0 | 3 | 0 | 2 | 0 | 0 | 0 |
| 25_Mar_10 | 1 | 3 | 0 | 0 | 0 | 0 | 0 | 1 |
| 01_Apr_10 | 0 | 0 | 0 | 0 | 0 | 0 | 0 | 0 |
| 09_Apr_10 | 0 | 0 | 2 | 11 | 0 | 0 | 0 | 0 |
| 17_Apr_10 | 2 | 0 | 0 | 6 | 0 | 0 | 1 | 4 |
| 25_Apr_10 | 3 | 3 | 3 | 8 | 0 | 0 | 0 | 0 |
| 03_May_10 | 1 | 2 | 3 | 9 | 6 | 6 | 0 | 0 |
| 11_May_10 | 0 | 4 | 0 | 8 | 4 | 7 | 0 | 1 |
| 19_May_10 | 3 | 7 | 5 | 11 | 7 | 4 | 0 | 0 |
| 27_May_10 | 2 | 3 | 3 | 15 | 5 | 6 | 0 | 0 |
| 04_Jun_10 | 4 | 5 | 2 | 9 | 3 | 9 | 3 | 7 |
| 12_Jun_10 | 0 | 3 | 0 | 7 | 5 | 11 | 3 | 2 |
| 20_Jun_10 | 2 | 2 | 3 | 11 | 3 | 15 | 4 | 2 |
| 28_Jun_10 | 3 | 4 | 2 | 9 | 6 | 9 | 3 | 0 |
| 06_July_10 | 5 | 3 | 5 | 6 | 4 | 10 | 4 | 0 |
| 14_July_10 | 3 | 2 | 2 | 8 | 3 | 14 | 2 | 3 |
| 22_July_10 | 2 | 4 | 6 | 5 | 6 | 8 | 4 | 2 |
| 30_July_10 | 3 | 3 | 2 | 4 | 3 | 7 | 5 | 6 |
| 07_Aug_10 | 2 | 2 | 4 | 3 | 4 | 10 | 4 | 2 |
| 15_Aug_10 | 5 | 4 | 6 | 4 | 3 | 8 | 4 | 5 |
| 23_Aug_10 | 3 | 6 | 3 | 2 | 5 | 3 | 7 | 7 |
| 31_Aug_10 | 2 | 8 | 3 | 1 | 6 | 4 | 3 | 6 |
| 08_Sept_10 | 5 | 4 | 6 | 6 | 4 | 2 | 5 | 4 |
| 16_Sept_10 | 3 | 5 | 8 | 4 | 6 | 4 | 2 | 7 |
| 24_Sept_10 | 2 | 3 | 5 | 3 | 3 | 3 | 1 | 6 |
| 02_Oct_10 | 4 | 6 | 3 | 4 | 1 | 4 | 6 | 2 |

**Supplementary Table 2:** Abundance of predators collected during the study period in Dar es Salaam from 2008 - 2010

| **Sampling date** | Predator species | | | | | | | | | |
| --- | --- | --- | --- | --- | --- | --- | --- | --- | --- | --- |
| *C. nigrita* | *C. runipustulatus* | *E. nigromaculatus* | *H. bigeminata* | *C. montrouzieri* | *H. amurensis* | *R. pumila* | *S. lemolea* | *C.* *perspicax* | *R. limbata* |
| 03_Nov_08 | 4 | 5 | 2 | 3 | 5 | 1 | 0 | 3 | 1 | 0 |
| 10_Nov_08 | 5 | 3 | 4 | 4 | 3 | 0 | 2 | 2 | 3 | 2 |
| 17_Nov_08 | 2 | 4 | 6 | 3 | 4 | 3 | 0 | 5 | 4 | 3 |
| 25_Nov_08 | 7 | 9 | 2 | 5 | 2 | 1 | 3 | 1 | 2 | 2 |
| 03_Dec_08 | 4 | 6 | 6 | 2 | 3 | 3 | 2 | 2 | 3 | 4 |
| 10_Dec_08 | 14 | 5 | 4 | 5 | 2 | 2 | 4 | 3 | 4 | 3 |
| 18_Dec_08 | 31 | 12 | 3 | 8 | 0 | 5 | 2 | 0 | 5 | 0 |
| 26_Dec_08 | 19 | 36 | 7 | 13 | 4 | 1 | 6 | 2 | 9 | 0 |
| 02_Jan_09 | 52 | 10 | 2 | 28 | 7 | 0 | 1 | 0 | 2 | 0 |
| 10_Jan_09 | 21 | 4 | 8 | 16 | 0 | 2 | 0 | 6 | 11 | 0 |
| 18_Jan_09 | 9 | 17 | 1 | 11 | 1 | 0 | 0 | 2 | 16 | 0 |
| 26_Jan_09 | 33 | 27 | 0 | 4 | 0 | 2 | 0 | 0 | 29 | 0 |
| 03_Feb_09 | 19 | 2 | 3 | 26 | 6 | 1 | 3 | 0 | 4 | 0 |
| 11_Feb_09 | 24 | 0 | 1 | 6 | 0 | 0 | 0 | 4 | 1 | 0 |
| 19_Feb_09 | 8 | 11 | 5 | 3 | 0 | 3 | 7 | 0 | 0 | 0 |
| 27_Feb_09 | 2 | 7 | 2 | 5 | 2 | 0 | 0 | 0 | 0 | 0 |
| 07_Mar_09 | 15 | 4 | 0 | 2 | 0 | 1 | 0 | 0 | 5 | 0 |
| 15_Mar_09 | 11 | 1 | 1 | 3 | 0 | 0 | 1 | 0 | 1 | 0 |
| 23_Mar_09 | 3 | 6 | 0 | 1 | 5 | 1 | 0 | 0 | 0 | 0 |
| 31_Mar_09 | 9 | 2 | 3 | 5 | 2 | 3 | 0 | 0 | 0 | 0 |
| 08_Apr_09 | 2 | 3 | 5 | 7 | 6 | 6 | 4 | 2 | 5 | 6 |
| 16_Apr_09 | 0 | 1 | 0 | 9 | 3 | 0 | 1 | 3 | 15 | 0 |
| 24_Apr_09 | 4 | 6 | 3 | 4 | 4 | 5 | 3 | 5 | 9 | 0 |
| 02_May_09 | 3 | 4 | 6 | 2 | 3 | 7 | 2 | 3 | 6 | 0 |
| 10_May_09 | 2 | 1 | 4 | 5 | 4 | 4 | 5 | 8 | 5 | 0 |
| 18_May_09 | 5 | 3 | 5 | 6 | 1 | 2 | 0 | 1 | 7 | 0 |
| 26_May_09 | 3 | 4 | 5 | 3 | 5 | 4 | 4 | 3 | 11 | 0 |
| 03_Jun_09 | 1 | 2 | 6 | 3 | 3 | 3 | 3 | 4 | 8 | 4 |
| 11_Jun_09 | 2 | 1 | 2 | 1 | 1 | 0 | 0 | 2 | 2 | 0 |
| 19_Jun_09 | 3 | 4 | 3 | 2 | 2 | 2 | 2 | 5 | 5 | 3 |
| 27_Jun_09 | 5 | 7 | 4 | 1 | 4 | 5 | 6 | 3 | 3 | 3 |
| 05_July_09 | 2 | 3 | 5 | 1 | 2 | 3 | 3 | 2 | 2 | 4 |
| 13_July_09 | 0 | 0 | 2 | 2 | 0 | 3 | 4 | 1 | 0 | 0 |
| 21_July_09 | 4 | 3 | 4 | 2 | 3 | 5 | 4 | 4 | 3 | 7 |
| 29_July_09 | 3 | 2 | 3 | 4 | 2 | 4 | 5 | 5 | 5 | 3 |
| 06_Aug_09 | 4 | 1 | 2 | 2 | 1 | 4 | 3 | 3 | 4 | 2 |
| 14_Aug_09 | 1 | 0 | 0 | 3 | 0 | 1 | 0 | 3 | 0 | 0 |
| 22_Aug_09 | 3 | 4 | 2 | 4 | 3 | 2 | 2 | 6 | 3 | 8 |
| 30_Aug_09 | 5 | 4 | 1 | 2 | 3 | 4 | 3 | 5 | 3 | 4 |
| 07_Sept_09 | 3 | 3 | 2 | 3 | 5 | 5 | 5 | 2 | 4 | 2 |
| 15_Sept_09 | 4 | 0 | 0 | 0 | 0 | 0 | 0 | 1 | 1 | 0 |
| 23_Sept_09 | 2 | 4 | 1 | 2 | 4 | 2 | 3 | 3 | 3 | 6 |
| 01_Oct_09 | 4 | 2 | 2 | 2 | 4 | 3 | 3 | 4 | 3 | 4 |
| 09_Oct_09 | 2 | 5 | 3 | 4 | 3 | 4 | 4 | 5 | 2 | 3 |
| 17_Oct_09 | 1 | 4 | 0 | 0 | 0 | 0 | 0 | 2 | 0 | 0 |
| 25_Oct_09 | 3 | 6 | 2 | 3 | 4 | 3 | 6 | 3 | 4 | 4 |
| 01_Nov_09 | 5 | 8 | 1 | 4 | 6 | 2 | 4 | 6 | 7 | 8 |
| 09_Nov_09 | 2 | 7 | 2 | 2 | 5 | 3 | 3 | 3 | 5 | 4 |
| 17_Nov_09 | 2 | 4 | 1 | 6 | 0 | 1 | 0 | 2 | 0 | 0 |
| 25_Nov_09 | 4 | 5 | 3 | 4 | 6 | 4 | 4 | 4 | 4 | 16 |
| 03_Dec_09 | 3 | 6 | 2 | 11 | 8 | 3 | 5 | 6 | 5 | 10 |
| 11_Dec_09 | 5 | 5 | 0 | 14 | 5 | 3 | 0 | 1 | 17 | 0 |
| 19_Dec_09 | 7 | 3 | 5 | 12 | 4 | 1 | 1 | 4 | 8 | 0 |
| 27_Dec_09 | 10 | 8 | 1 | 25 | 2 | 0 | 3 | 1 | 14 | 0 |
| 04_Jan_10 | 26 | 12 | 4 | 17 | 12 | 0 | 0 | 2 | 5 | 1 |
| 12_Jan_10 | 20 | 0 | 1 | 13 | 23 | 3 | 0 | 1 | 4 | 0 |
| 20_Jan_10 | 22 | 2 | 0 | 10 | 16 | 0 | 0 | 0 | 9 | 3 |
| 28_Jan_10 | 14 | 0 | 0 | 8 | 9 | 0 | 2 | 2 | 5 | 0 |
| 05_Feb_10 | 16 | 0 | 3 | 5 | 5 | 1 | 0 | 0 | 2 | 1 |
| 13_Feb_10 | 9 | 5 | 0 | 6 | 1 | 0 | 0 | 0 | 4 | 0 |
| 21_Feb_10 | 5 | 0 | 4 | 7 | 3 | 0 | 0 | 1 | 0 | 3 |
| 01_Mar_10 | 11 | 2 | 0 | 0 | 0 | 2 | 2 | 0 | 1 | 0 |
| 09_Mar_10 | 2 | 6 | 0 | 1 | 5 | 0 | 0 | 0 | 0 | 0 |
| 17_Mar_10 | 7 | 11 | 0 | 0 | 1 | 0 | 0 | 2 | 0 | 2 |
| 25_Mar_10 | 3 | 0 | 1 | 2 | 0 | 0 | 1 | 0 | 2 | 0 |
| 01_Apr_10 | 3 | 0 | 0 | 0 | 1 | 0 | 0 | 0 | 1 | 0 |
| 09_Apr_10 | 2 | 3 | 2 | 0 | 2 | 2 | 2 | 2 | 3 | 1 |
| 17_Apr_10 | 2 | 1 | 0 | 3 | 1 | 0 | 1 | 1 | 4 | 0 |
| 25_Apr_10 | 4 | 3 | 3 | 3 | 2 | 1 | 3 | 4 | 2 | 1 |
| 03_May_10 | 3 | 5 | 2 | 4 | 3 | 2 | 4 | 2 | 4 | 2 |
| 11_May_10 | 5 | 0 | 1 | 1 | 0 | 0 | 0 | 0 | 1 | 0 |
| 19_May_10 | 3 | 2 | 3 | 2 | 2 | 3 | 4 | 2 | 3 | 1 |
| 27_May_10 | 5 | 2 | 4 | 1 | 3 | 4 | 2 | 1 | 2 | 2 |
| 04_Jun_10 | 3 | 4 | 2 | 3 | 2 | 2 | 1 | 2 | 1 | 1 |
| 12_Jun_10 | 3 | 0 | 0 | 5 | 0 | 0 | 0 | 0 | 2 | 0 |
| 20_Jun_10 | 5 | 1 | 2 | 3 | 2 | 0 | 2 | 0 | 4 | 0 |
| 28_Jun_10 | 3 | 2 | 3 | 2 | 3 | 0 | 1 | 0 | 6 | 0 |
| 06_July_10 | 4 | 3 | 4 | 3 | 0 | 0 | 2 | 0 | 3 | 0 |
| 14_July_10 | 2 | 2 | 6 | 4 | 3 | 2 | 3 | 1 | 2 | 0 |
| 22_July_10 | 1 | 4 | 3 | 1 | 2 | 4 | 0 | 3 | 1 | 0 |
| 30_July_10 | 5 | 1 | 4 | 3 | 1 | 2 | 0 | 2 | 2 | 0 |
| 07_Aug_10 | 3 | 2 | 2 | 4 | 0 | 4 | 1 | 3 | 4 | 1 |
| 15_Aug_10 | 2 | 3 | 4 | 3 | 0 | 5 | 3 | 2 | 4 | 2 |
| 23_Aug_10 | 4 | 4 | 5 | 3 | 0 | 2 | 2 | 1 | 2 | 3 |
| 31_Aug_10 | 3 | 2 | 3 | 4 | 0 | 1 | 3 | 2 | 14 | 0 |
| 08_Sept_10 | 4 | 2 | 4 | 2 | 2 | 0 | 2 | 4 | 8 | 0 |
| 16_Sept_10 | 6 | 3 | 5 | 3 | 1 | 0 | 3 | 2 | 6 | 0 |
| 24_Sept_10 | 3 | 2 | 2 | 2 | 2 | 0 | 1 | 2 | 3 | 2 |
| 02_Oct_10 | 1 | 3 | 3 | 3 | 1 | 0 | 1 | 2 | 3 | 2 |
